# Supplementary material for: Use of the Behavioral Regulation in Exercise Questionnaire-2 to assess motivation for physical activity in persons with rheumatoid arthritis: an observational study
Source: PubMed Central journal article supplement (PMC9510116; doi:10.1007/s00296-021-05079-9), 2022-01-09
Supplement: 296_2021_5079_MOESM1_ESM.pdf [file 296_2021_5079_MOESM1_ESM.pdf]

Videm V, Hoff M, Liff MH: Use of the Behavioral Regulation in Exercise Questionnaire-2 to assess motivation for physical activity in persons with rheumatoid arthritis – an observational study

Rheumatology International

Corresponding author: Vibeke Videm, Department of Clinical and Molecular Medicine, NTNU - Norwegian University of Science and Technology and Department of Immunology and Transfusion Medicine, St. Olavs University Hospital, Trondheim, Norway. E-mail: vibeke.videm@ntnu.no

## Online Resource 1: Norwegian version of the BREQ-2 questionnaire<sup>a</sup>

### BREQ-2: Grunner til å trene eller være fysisk aktiv

Vi ønsker å undersøke hvorfor personer deltar eller ikke deltar i fysisk aktivitet og trening. Vennligst merk av i hvilken grad påstandene under passer for deg ved å sette kryss i én av rutene på skalaen på hver linje. Det finnes ingen riktige eller gale svar – vi ønsker bare å få en beskrivelse av dine personlige følelser rundt trening. Vennligst svar på alle spørsmålene.

|                                                                             | Ikke sant for meg |  | Delvis sant for meg |  | Veldig sant for meg |
|-----------------------------------------------------------------------------|-------------------|--|---------------------|--|---------------------|
| 1. Jeg trener fordi andre sier at jeg bør                                   |                   |  |                     |  |                     |
| 2. Jeg får dårlig samvittighet når jeg ikke trener                          |                   |  |                     |  |                     |
| 3. Jeg verdsetter fordelene ved trening                                     |                   |  |                     |  |                     |
| 4. Jeg trener fordi det er gøy                                              |                   |  |                     |  |                     |
| 5. Jeg skjønner ikke hvorfor jeg skulle være nødt til å trene               |                   |  |                     |  |                     |
| 6. Jeg deltar i trening fordi venner/partner/familie mener jeg bør          |                   |  |                     |  |                     |
| 7. Jeg skammer meg når jeg går glipp av en treningsøkt                      |                   |  |                     |  |                     |
| 8. Det er viktig for meg å trene regelmessig                                |                   |  |                     |  |                     |
| 9. Jeg skjønner ikke hvorfor jeg skulle gidde å trene                       |                   |  |                     |  |                     |
| 10. Jeg liker treningsøktene mine                                           |                   |  |                     |  |                     |
| 11. Jeg trener fordi andre ikke ville være fornøyde med meg om jeg lar være |                   |  |                     |  |                     |
| 12. Jeg ser ikke noe poeng i å trene                                        |                   |  |                     |  |                     |
| 13. Jeg føler meg mislykket når jeg ikke har trent på en stund              |                   |  |                     |  |                     |
| 14. Jeg mener det er viktig å gjøre en innsats for å trene regelmessig      |                   |  |                     |  |                     |
| 15. Jeg synes trening er en lystbetont aktivitet                            |                   |  |                     |  |                     |
| 16. Jeg føler press fra venner/familie om å trene                           |                   |  |                     |  |                     |
| 17. Jeg blir rastløs om jeg ikke trener regelmessig                         |                   |  |                     |  |                     |
| 18. Jeg blir glad og tilfreds av å delta i trening                          |                   |  |                     |  |                     |
| 19. Jeg synes trening er bortkastet tid                                     |                   |  |                     |  |                     |

<sup>a</sup>Translated from: Markland D, Tobin V. A modification to the Behavioural Regulation in Exercise Questionnaire to include an assessment of amotivation. J Sport Exerc Psychol 2004;26:191-196.
