# Supplementary material for: Use of the Behavioral Regulation in Exercise Questionnaire-2 to assess motivation for physical activity in persons with rheumatoid arthritis: an observational study
Source: PubMed Central journal article supplement (PMC9510116; doi:10.1007/s00296-021-05079-9), 2022-01-09
Supplement: 296_2021_5079_MOESM2_ESM.pdf [file 296_2021_5079_MOESM2_ESM.pdf]

Videm V, Hoff M, Liff MH: Use of the Behavioral Regulation in Exercise Questionnaire-2 to assess motivation for physical activity in persons with rheumatoid arthritis – an observational study  
Rheumatology International

Corresponding author: Vibeke Videm, Department of Clinical and Molecular Medicine, NTNU - Norwegian University of Science and Technology and Department of Immunology and Transfusion Medicine, St. Olavs University Hospital, Trondheim, Norway. E-mail: [vibeke.videm@ntnu.no](mailto:vibeke.videm@ntnu.no)

## Online Resource 2: Common fit indices for structural equation models<sup>a,b</sup>

| Fit index                                | Abbreviation | Explanation                                                                                                   | Indication of fit                                          |
|------------------------------------------|--------------|---------------------------------------------------------------------------------------------------------------|------------------------------------------------------------|
| Chi square test                          |              | Overall fit compared to model with no correlations                                                            | $p > 0.05$ : good fit, but too sensitive in large studies  |
| Root Mean Squared Error of Approximation | RMSEA        | Compares observed covariance matrix and model covariance matrix, adjusts for model complexity and sample size | $p = 0.05 - 0.08$ : good fit<br>$p < 0.05$ : excellent fit |
| Tucker Lewis Index                       | TLI          | Compares model to model with no correlations, adjusts for model complexity                                    | $\geq 0.90$ : good fit<br>$> 0.95$ : excellent fit         |
| Comparative Fit Index                    | CFI          | Compares model to model with no correlations, adjusts for model degrees of freedom                            | $\geq 0.90$ : good fit<br>$> 0.95$ : excellent fit         |
| Standardized Root Mean Square Residual   | SRMR         | Evaluates residuals between observed data and model                                                           | $\leq 0.10$ : good fit                                     |

<sup>a</sup> Mehmetoglu M, Jakobsen TG (2017) Applied statistics using Stata. A guide for the social sciences. Sage Publications, pp 305-309

<sup>b</sup> Baldwin SA (2019) Psychological statistics and psychometrics using Stata. Stata Press, pp 392-395
