# Supplementary material for: Use of the Behavioral Regulation in Exercise Questionnaire-2 to assess motivation for physical activity in persons with rheumatoid arthritis: an observational study
Source: PubMed Central journal article supplement (PMC9510116; doi:10.1007/s00296-021-05079-9), 2022-01-09
Supplement: 296_2021_5079_MOESM4_ESM.pdf [file 296_2021_5079_MOESM4_ESM.pdf]

Videm V, Hoff M, Liff MH: Use of the Behavioral Regulation in Exercise Questionnaire-2 to assess motivation for physical activity in persons with rheumatoid arthritis – an observational study

Rheumatology International

Corresponding author: Vibeke Videm, Department of Clinical and Molecular Medicine, NTNU - Norwegian University of Science and Technology and Department of Immunology and Transfusion Medicine, St. Olavs University Hospital, Trondheim, Norway. E-mail: [vibeke.videm@ntnu.no](mailto:vibeke.videm@ntnu.no)

#### Online Resource 4: Participant characteristics in exploratory study

| Variable    | Persons with rheumatoid arthritis (n=93) | Student group 1 (n=248) | Student group 2 (n=106) | P-value <sup>a</sup> |
|-------------|------------------------------------------|-------------------------|-------------------------|----------------------|
| Women       | 68 (73%)                                 | 156 (63%)               | 30 (28%)                | <0.001               |
| Age (years) | 59 (12)                                  | 23 (3)                  | 21 (1)                  | <0.001               |

<sup>a</sup>Chi-square test or ANOVA
