# Supplementary material for: Use of the Behavioral Regulation in Exercise Questionnaire-2 to assess motivation for physical activity in persons with rheumatoid arthritis: an observational study
Source: PubMed Central journal article supplement (PMC9510116; doi:10.1007/s00296-021-05079-9), 2022-01-09
Supplement: 296_2021_5079_MOESM5_ESM.pdf [file 296_2021_5079_MOESM5_ESM.pdf]

Videm V, Hoff M, Liff MH: Use of the Behavioral Regulation in Exercise Questionnaire-2 to assess motivation for physical activity in persons with rheumatoid arthritis – an observational study  
 Rheumatology International

Corresponding author: Vibeke Videm, Department of Clinical and Molecular Medicine, NTNU - Norwegian University of Science and Technology and Department of Immunology and Transfusion Medicine, St. Olavs University Hospital, Trondheim, Norway. E-mail: vibeke.videm@ntnu.no

### Online Resource 5: BREQ-2 psychometric properties

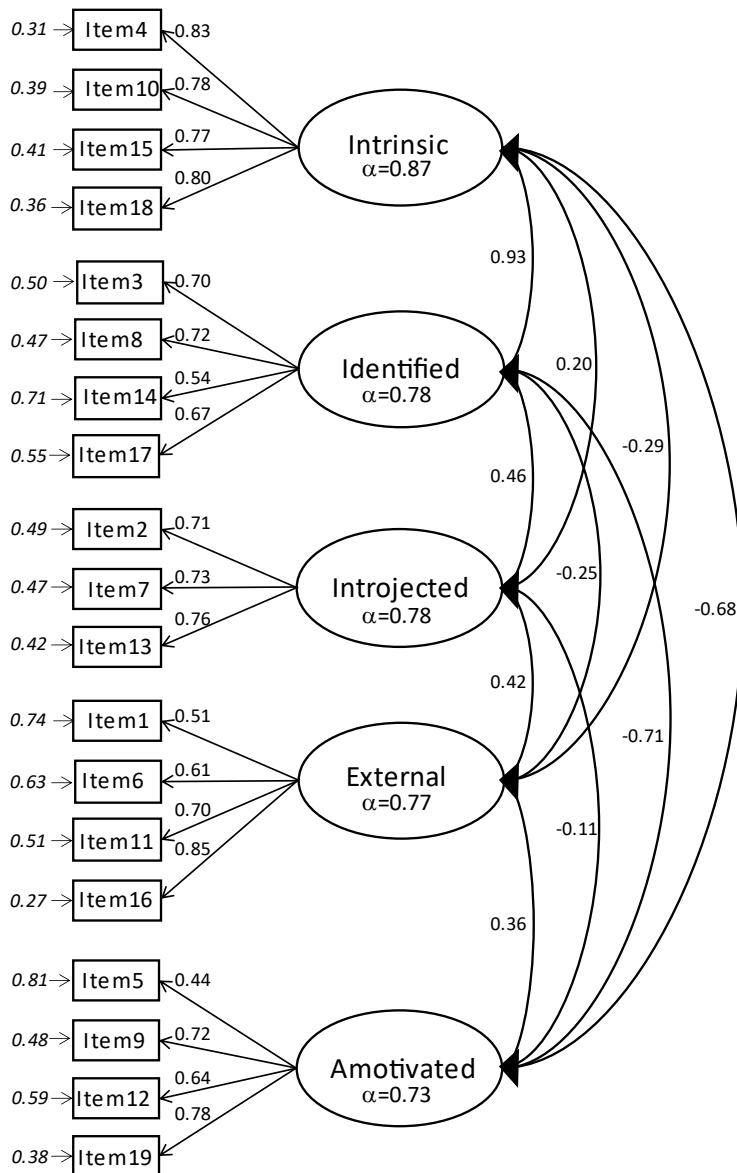

Results from confirmatory factor analysis (n=447): Numbers indicate correlations between items and their corresponding factors, and among factors. Left-hand numbers in italics show item error variances. Cronbach's alpha ( $\alpha$ ) for each factor indicates internal consistency (reliability).

Abbreviation: BREQ-2: Behavioral Regulation in Exercise Questionnaire-2
